# Supplementary material for: Based on M-Copula Reliability Analysis of Random Load Correlation
Source: Hindawi journal article supplement (doi:10.1155/2020/1268762), 2020-08-05
Supplement: f1 [file 1268762.f1.pdf]

## Support materials

## Specimens statistics

| Specimen | S1                  | S2      | S3      | S2      | S3      | S2      | S3      |
|----------|---------------------|---------|---------|---------|---------|---------|---------|
| number   | (Case1,Case2,Case3) | (Case1) | (Case1) | (Case2) | (Case2) | (Case3) | (Case3) |
| 1        | 5.392               | 5.912   | 8.852   | 8.304   | 9.656   | 6.550   | 8.649   |
| 2        | 4.593               | 8.533   | 7.348   | 10.696  | 7.844   | 11.698  | 7.995   |
| 3        | 4.806               | 5.148   | 9.591   | 12.093  | 7.200   | 7.241   | 12.721  |
| 4        | 5.076               | 10.952  | 10.547  | 9.282   | 8.762   | 5.869   | 10.354  |
| 5        | 5.173               | 4.420   | 8.332   | 10.988  | 9.524   | 6.946   | 10.383  |
| 6        | 5.147               | 6.280   | 9.925   | 11.469  | 6.758   | 5.589   | 8.186   |
| 7        | 5.060               | 8.406   | 9.053   | 10.061  | 7.997   | 4.548   | 10.369  |
| 8        | 4.928               | 6.993   | 8.908   | 9.240   | 7.273   | 7.412   | 10.471  |
| 9        | 4.818               | 4.710   | 11.551  | 8.731   | 6.849   | 7.190   | 8.019   |
| 10       | 5.151               | 8.508   | 11.643  | 7.667   | 8.681   | 8.024   | 7.601   |
| 11       | 4.878               | 7.071   | 12.502  | 9.238   | 9.175   | 5.428   | 6.490   |
| 12       | 5.133               | 5.570   | 7.743   | 10.115  | 5.731   | 5.485   | 11.764  |
| 13       | 5.343               | 7.498   | 9.491   | 9.407   | 10.013  | 5.954   | 7.891   |
| 14       | 4.291               | 8.171   | 11.247  | 10.240  | 8.066   | 5.206   | 9.875   |
| 15       | 5.568               | 11.576  | 7.404   | 9.878   | 7.397   | 13.648  | 9.952   |
| 16       | 4.801               | 6.641   | 14.775  | 11.258  | 5.456   | 7.454   | 9.969   |
| 17       | 5.415               | 6.324   | 10.274  | 8.572   | 7.361   | 5.707   | 8.542   |
| 18       | 5.489               | 6.008   | 8.694   | 9.543   | 7.679   | 7.558   | 9.320   |
| 19       | 4.537               | 4.247   | 12.196  | 10.292  | 7.984   | 9.323   | 9.163   |
| 20       | 5.056               | 7.716   | 10.596  | 9.041   | 7.070   | 8.073   | 13.014  |
| 21       | 6.092               | 4.117   | 10.004  | 10.375  | 9.607   | 8.593   | 7.654   |
| 22       | 4.932               | 6.362   | 8.446   | 6.745   | 11.100  | 7.670   | 9.361   |
| 23       | 5.153               | 6.354   | 6.691   | 10.770  | 10.319  | 4.568   | 12.257  |
| 24       | 5.104               | 8.350   | 7.947   | 10.777  | 7.406   | 5.550   | 10.690  |
| 25       | 5.399               | 3.457   | 8.508   | 9.780   | 8.412   | 8.919   | 7.765   |
| 26       | 5.344               | 8.500   | 10.769  | 9.085   | 8.548   | 6.426   | 11.567  |
| 27       | 4.702               | 5.987   | 11.150  | 8.934   | 6.782   | 7.239   | 5.517   |
| 28       | 4.862               | 4.957   | 8.257   | 6.844   | 7.780   | 7.819   | 8.809   |
| 29       | 5.108               | 6.780   | 11.673  | 12.308  | 6.831   | 5.184   | 13.630  |
| 30       | 4.982               | 7.193   | 11.277  | 11.177  | 7.922   | 7.110   | 10.867  |
| 31       | 5.799               | 6.127   | 9.513   | 7.790   | 11.206  | 6.041   | 11.563  |
| 32       | 5.138               | 4.748   | 7.969   | 7.178   | 7.479   | 4.607   | 9.587   |
| 33       | 5.138               | 9.119   | 11.834  | 9.024   | 6.617   | 7.497   | 9.021   |
| 34       | 4.736               | 7.130   | 9.504   | 11.283  | 10.634  | 5.430   | 11.331  |
| 35       | 4.588               | 5.719   | 7.863   | 11.648  | 9.493   | 5.935   | 15.975  |
| 36       | 5.250               | 9.142   | 10.316  | 10.943  | 6.930   | 4.772   | 9.238   |
| 37       | 4.938               | 7.431   | 10.934  | 11.491  | 6.608   | 5.782   | 13.258  |
| 38       | 5.204               | 4.988   | 7.142   | 14.131  | 10.715  | 7.588   | 8.722   |

---

|    |       |       |        |        |        |        |        |
|----|-------|-------|--------|--------|--------|--------|--------|
| 39 | 4.738 | 7.906 | 14.585 | 6.844  | 7.855  | 10.192 | 8.927  |
| 40 | 5.282 | 4.385 | 6.163  | 10.794 | 8.132  | 5.038  | 11.223 |
| 41 | 4.429 | 5.250 | 6.881  | 9.672  | 8.438  | 7.403  | 8.077  |
| 42 | 5.494 | 7.051 | 12.707 | 8.362  | 6.770  | 7.755  | 11.938 |
| 43 | 5.267 | 7.512 | 10.479 | 11.368 | 9.966  | 8.883  | 6.845  |
| 44 | 5.035 | 6.913 | 8.913  | 9.771  | 13.245 | 9.397  | 5.855  |
| 45 | 4.634 | 4.241 | 9.797  | 12.580 | 4.456  | 5.071  | 9.454  |
| 46 | 4.875 | 8.297 | 11.433 | 7.877  | 8.155  | 6.875  | 10.484 |
| 47 | 5.080 | 9.243 | 8.112  | 8.191  | 9.649  | 9.326  | 12.811 |
| 48 | 5.380 | 9.033 | 11.926 | 10.713 | 6.521  | 7.799  | 10.029 |
| 49 | 4.674 | 5.913 | 11.349 | 8.122  | 7.959  | 9.746  | 11.969 |
| 50 | 5.408 | 6.172 | 9.678  | 10.035 | 8.105  | 9.291  | 10.289 |
| 51 | 5.872 | 5.302 | 10.182 | 8.993  | 6.815  | 12.465 | 11.292 |
| 52 | 4.844 | 7.222 | 8.539  | 12.311 | 9.144  | 3.417  | 7.964  |
| 53 | 5.148 | 7.226 | 8.132  | 10.720 | 10.252 | 6.205  | 9.621  |
| 54 | 4.793 | 5.629 | 8.991  | 8.983  | 8.202  | 6.194  | 8.615  |
| 55 | 4.459 | 8.503 | 12.185 | 8.557  | 8.477  | 4.668  | 9.299  |
| 56 | 5.463 | 8.365 | 9.283  | 8.987  | 6.897  | 5.906  | 15.906 |
| 57 | 5.219 | 7.976 | 8.870  | 16.156 | 10.032 | 9.803  | 7.262  |
| 58 | 4.839 | 5.654 | 7.921  | 9.682  | 7.643  | 6.872  | 9.849  |
| 59 | 5.036 | 4.902 | 7.663  | 9.376  | 8.613  | 8.692  | 9.135  |
| 60 | 4.928 | 7.966 | 9.819  | 9.386  | 10.160 | 10.362 | 10.596 |
| 61 | 4.540 | 9.671 | 12.216 | 13.442 | 7.295  | 6.273  | 14.295 |
| 62 | 4.092 | 4.961 | 12.728 | 6.805  | 7.467  | 6.081  | 11.863 |
| 63 | 4.985 | 3.965 | 11.020 | 12.351 | 7.961  | 4.800  | 8.508  |
| 64 | 4.854 | 9.645 | 9.146  | 8.414  | 7.418  | 6.294  | 7.217  |
| 65 | 4.818 | 6.693 | 9.031  | 9.238  | 5.863  | 5.616  | 11.702 |
| 66 | 4.734 | 9.056 | 10.570 | 11.275 | 8.694  | 6.390  | 7.925  |
| 67 | 4.428 | 8.641 | 11.949 | 8.040  | 5.639  | 6.380  | 8.403  |
| 68 | 4.836 | 5.048 | 12.044 | 10.696 | 7.284  | 5.596  | 10.791 |
| 69 | 5.051 | 6.116 | 6.203  | 9.631  | 5.681  | 5.020  | 7.082  |
| 70 | 4.666 | 5.543 | 9.676  | 7.297  | 10.454 | 6.132  | 13.597 |
| 71 | 5.142 | 7.099 | 7.942  | 10.185 | 7.951  | 6.792  | 9.993  |
| 72 | 4.914 | 9.031 | 8.833  | 11.048 | 8.688  | 5.357  | 9.305  |
| 73 | 4.968 | 6.888 | 14.180 | 11.182 | 7.352  | 7.417  | 11.603 |
| 74 | 4.550 | 4.071 | 8.271  | 8.689  | 11.147 | 6.517  | 11.599 |
| 75 | 4.759 | 9.184 | 6.810  | 9.750  | 7.122  | 6.322  | 9.275  |
| 76 | 5.129 | 6.799 | 10.151 | 11.146 | 10.108 | 8.582  | 12.350 |
| 77 | 4.751 | 6.074 | 9.515  | 10.940 | 10.111 | 12.344 | 10.569 |
| 78 | 5.051 | 4.068 | 8.939  | 9.016  | 6.930  | 8.439  | 12.344 |
| 79 | 5.623 | 7.444 | 11.802 | 7.494  | 8.591  | 8.000  | 10.339 |
| 80 | 5.251 | 7.214 | 11.034 | 10.358 | 8.025  | 6.774  | 9.390  |

---

---

|     |       |        |        |        |        |        |        |
|-----|-------|--------|--------|--------|--------|--------|--------|
| 81  | 5.327 | 7.380  | 10.593 | 10.456 | 12.554 | 6.999  | 14.163 |
| 82  | 5.744 | 5.224  | 9.209  | 13.392 | 6.236  | 7.874  | 8.283  |
| 83  | 5.370 | 5.686  | 10.535 | 7.064  | 5.461  | 5.858  | 11.182 |
| 84  | 5.125 | 5.434  | 9.180  | 9.083  | 8.365  | 4.585  | 15.008 |
| 85  | 5.615 | 10.508 | 10.171 | 10.715 | 6.271  | 7.567  | 8.958  |
| 86  | 4.715 | 5.563  | 11.059 | 9.577  | 6.832  | 5.635  | 11.185 |
| 87  | 4.785 | 6.477  | 10.511 | 14.966 | 8.404  | 7.498  | 10.463 |
| 88  | 5.636 | 5.469  | 8.459  | 9.058  | 5.824  | 5.449  | 9.083  |
| 89  | 5.143 | 8.485  | 8.709  | 5.961  | 9.927  | 4.880  | 9.771  |
| 90  | 4.987 | 6.775  | 7.818  | 11.400 | 8.576  | 4.693  | 11.145 |
| 91  | 5.144 | 6.917  | 12.104 | 7.297  | 10.742 | 7.281  | 16.013 |
| 92  | 4.917 | 8.544  | 9.718  | 12.887 | 7.271  | 11.262 | 11.798 |
| 93  | 4.908 | 8.011  | 8.488  | 10.647 | 9.579  | 7.129  | 9.285  |
| 94  | 4.878 | 8.231  | 11.302 | 9.102  | 6.064  | 7.689  | 6.438  |
| 95  | 4.825 | 4.039  | 8.758  | 7.966  | 8.234  | 7.025  | 10.308 |
| 96  | 4.703 | 7.169  | 10.754 | 14.438 | 10.043 | 7.184  | 10.334 |
| 97  | 4.981 | 8.601  | 13.530 | 10.438 | 6.741  | 12.536 | 8.269  |
| 98  | 4.819 | 7.400  | 11.950 | 8.830  | 7.955  | 5.519  | 12.109 |
| 99  | 5.454 | 8.466  | 9.442  | 8.457  | 11.268 | 6.492  | 10.622 |
| 100 | 5.074 | 11.399 | 9.537  | 9.420  | 6.538  | 5.676  | 11.073 |
| 101 | 5.322 | 9.214  | 14.808 | 12.729 | 6.076  | 8.151  | 8.821  |
| 102 | 4.956 | 5.167  | 9.421  | 14.601 | 9.623  | 7.232  | 8.459  |
| 103 | 4.974 | 5.550  | 10.425 | 9.839  | 7.759  | 6.213  | 8.856  |
| 104 | 5.396 | 6.596  | 10.480 | 10.699 | 6.089  | 8.210  | 7.728  |
| 105 | 5.463 | 5.809  | 11.917 | 10.469 | 6.379  | 5.206  | 8.753  |
| 106 | 5.010 | 6.665  | 10.234 | 6.924  | 8.432  | 6.980  | 11.406 |
| 107 | 5.533 | 9.168  | 10.571 | 10.075 | 8.242  | 7.129  | 6.064  |
| 108 | 5.150 | 5.969  | 10.472 | 8.813  | 7.207  | 10.198 | 6.718  |
| 109 | 5.116 | 6.337  | 17.400 | 8.944  | 8.213  | 7.786  | 9.833  |
| 110 | 5.690 | 6.428  | 11.793 | 9.478  | 8.856  | 6.825  | 10.483 |
| 111 | 5.484 | 8.010  | 8.097  | 5.338  | 6.617  | 4.769  | 7.998  |
| 112 | 5.286 | 8.750  | 7.526  | 8.387  | 7.258  | 4.611  | 10.955 |
| 113 | 5.127 | 6.552  | 6.911  | 11.463 | 6.625  | 7.892  | 12.767 |
| 114 | 4.830 | 6.289  | 14.503 | 10.034 | 10.545 | 5.637  | 11.302 |
| 115 | 4.964 | 8.532  | 8.198  | 8.780  | 5.850  | 6.354  | 7.021  |
| 116 | 5.574 | 8.106  | 12.090 | 9.108  | 11.216 | 5.394  | 8.376  |
| 117 | 4.363 | 7.654  | 10.958 | 7.801  | 6.861  | 7.094  | 8.160  |
| 118 | 4.799 | 15.071 | 7.043  | 8.453  | 7.796  | 7.180  | 9.101  |
| 119 | 4.941 | 6.848  | 15.083 | 8.658  | 9.675  | 10.663 | 8.482  |
| 120 | 5.047 | 7.385  | 11.002 | 9.409  | 9.209  | 10.868 | 8.181  |
| 121 | 4.438 | 6.658  | 14.441 | 11.066 | 7.223  | 8.924  | 14.655 |
| 122 | 5.167 | 7.897  | 10.518 | 9.740  | 9.526  | 8.976  | 9.112  |

---

---

|     |       |        |        |        |        |        |        |
|-----|-------|--------|--------|--------|--------|--------|--------|
| 123 | 5.230 | 5.978  | 10.156 | 9.621  | 5.981  | 4.988  | 9.467  |
| 124 | 4.704 | 8.688  | 7.853  | 8.211  | 10.644 | 9.436  | 10.390 |
| 125 | 4.918 | 10.615 | 9.852  | 12.010 | 10.127 | 5.293  | 6.775  |
| 126 | 4.618 | 6.938  | 10.064 | 10.278 | 7.833  | 4.459  | 7.678  |
| 127 | 5.512 | 6.683  | 7.052  | 11.015 | 8.542  | 15.446 | 10.801 |
| 128 | 5.118 | 5.922  | 9.733  | 10.243 | 9.723  | 7.352  | 10.534 |
| 129 | 4.921 | 6.054  | 10.121 | 11.587 | 7.245  | 5.692  | 7.646  |
| 130 | 4.708 | 4.485  | 8.372  | 13.432 | 8.819  | 6.780  | 12.411 |
| 131 | 5.031 | 6.706  | 10.672 | 8.937  | 9.104  | 6.889  | 9.641  |
| 132 | 5.531 | 5.481  | 7.534  | 10.961 | 8.481  | 3.944  | 10.076 |
| 133 | 5.087 | 9.230  | 8.641  | 11.280 | 5.666  | 5.615  | 10.007 |
| 134 | 5.111 | 7.058  | 9.996  | 9.765  | 7.233  | 7.767  | 8.703  |
| 135 | 4.622 | 6.887  | 8.583  | 14.604 | 5.000  | 6.829  | 6.634  |
| 136 | 5.052 | 9.557  | 10.698 | 7.969  | 7.156  | 4.386  | 9.511  |
| 137 | 5.244 | 4.407  | 9.041  | 8.835  | 6.530  | 5.952  | 7.019  |
| 138 | 4.565 | 7.364  | 8.101  | 9.944  | 7.633  | 6.507  | 9.443  |
| 139 | 5.355 | 5.250  | 11.934 | 9.837  | 8.491  | 6.911  | 10.217 |
| 140 | 5.777 | 5.808  | 11.115 | 9.337  | 9.402  | 4.368  | 10.197 |
| 141 | 4.509 | 7.237  | 11.047 | 8.847  | 7.553  | 7.232  | 7.290  |
| 142 | 4.349 | 8.446  | 11.320 | 11.628 | 7.871  | 10.080 | 10.568 |
| 143 | 4.977 | 5.541  | 12.135 | 9.660  | 9.798  | 4.467  | 7.566  |
| 144 | 5.239 | 7.776  | 12.087 | 8.261  | 10.443 | 7.586  | 10.314 |
| 145 | 4.974 | 9.697  | 9.843  | 14.007 | 8.191  | 9.604  | 11.111 |
| 146 | 4.950 | 5.516  | 8.873  | 11.844 | 9.468  | 7.471  | 13.719 |
| 147 | 5.002 | 5.335  | 9.543  | 13.365 | 6.619  | 7.889  | 6.333  |
| 148 | 4.665 | 6.776  | 12.745 | 9.728  | 11.144 | 5.978  | 11.656 |
| 149 | 4.482 | 7.917  | 7.558  | 14.616 | 6.719  | 6.447  | 9.448  |
| 150 | 5.498 | 6.797  | 8.658  | 11.862 | 6.563  | 5.020  | 9.623  |
| 151 | 5.092 | 5.568  | 12.224 | 6.697  | 8.804  | 6.555  | 8.680  |
| 152 | 4.626 | 6.988  | 11.717 | 7.504  | 7.686  | 5.858  | 10.275 |
| 153 | 5.339 | 7.147  | 8.787  | 11.056 | 5.458  | 5.700  | 9.257  |
| 154 | 4.591 | 6.097  | 9.348  | 9.547  | 9.940  | 9.867  | 8.577  |
| 155 | 4.962 | 5.170  | 9.451  | 9.492  | 9.121  | 6.563  | 8.724  |
| 156 | 5.233 | 7.556  | 9.212  | 12.254 | 11.301 | 7.974  | 11.142 |
| 157 | 4.735 | 6.823  | 5.786  | 13.976 | 8.335  | 7.462  | 10.851 |
| 158 | 4.890 | 6.219  | 8.916  | 10.619 | 9.141  | 5.193  | 12.346 |
| 159 | 5.009 | 5.825  | 10.442 | 10.047 | 6.020  | 4.134  | 10.560 |
| 160 | 5.615 | 6.014  | 16.536 | 15.680 | 11.853 | 4.656  | 9.481  |
| 161 | 5.145 | 5.500  | 7.141  | 9.761  | 13.300 | 7.271  | 7.683  |
| 162 | 4.874 | 5.272  | 8.527  | 8.901  | 7.159  | 6.255  | 10.452 |
| 163 | 4.929 | 9.252  | 8.997  | 8.636  | 6.671  | 8.248  | 9.163  |
| 164 | 4.912 | 6.406  | 7.984  | 8.385  | 9.769  | 6.128  | 10.248 |

---

---

|     |       |        |        |        |        |       |        |
|-----|-------|--------|--------|--------|--------|-------|--------|
| 165 | 5.412 | 4.457  | 8.457  | 9.952  | 6.042  | 4.793 | 11.768 |
| 166 | 4.910 | 6.032  | 6.467  | 8.168  | 8.074  | 6.938 | 8.809  |
| 167 | 4.751 | 8.800  | 9.540  | 6.627  | 7.567  | 9.016 | 8.828  |
| 168 | 5.076 | 5.959  | 8.744  | 7.473  | 9.395  | 7.251 | 9.256  |
| 169 | 4.970 | 10.482 | 10.961 | 10.719 | 5.008  | 6.446 | 10.229 |
| 170 | 5.250 | 5.618  | 9.894  | 12.297 | 8.020  | 6.063 | 15.054 |
| 171 | 5.302 | 5.655  | 12.283 | 12.587 | 8.274  | 9.417 | 8.127  |
| 172 | 5.342 | 5.281  | 13.836 | 15.884 | 5.236  | 8.587 | 12.988 |
| 173 | 5.204 | 9.025  | 10.031 | 7.795  | 7.526  | 6.049 | 9.342  |
| 174 | 5.199 | 5.898  | 7.493  | 13.021 | 8.986  | 4.763 | 11.827 |
| 175 | 5.600 | 7.523  | 10.298 | 9.952  | 5.854  | 5.332 | 9.903  |
| 176 | 4.635 | 4.546  | 13.191 | 8.869  | 7.291  | 7.380 | 8.732  |
| 177 | 4.891 | 5.909  | 9.574  | 8.947  | 8.153  | 5.089 | 9.256  |
| 178 | 4.466 | 7.980  | 10.620 | 11.788 | 6.935  | 6.117 | 11.980 |
| 179 | 5.290 | 4.972  | 7.943  | 11.210 | 11.113 | 6.554 | 12.788 |
| 180 | 5.007 | 6.878  | 13.509 | 6.700  | 9.274  | 5.697 | 11.986 |
| 181 | 4.906 | 7.767  | 10.657 | 12.126 | 6.848  | 5.750 | 8.677  |
| 182 | 4.458 | 10.485 | 8.926  | 11.630 | 8.404  | 6.378 | 7.442  |
| 183 | 5.058 | 7.945  | 6.824  | 9.310  | 10.056 | 5.861 | 10.645 |
| 184 | 4.918 | 8.560  | 8.432  | 7.964  | 8.248  | 4.768 | 10.935 |
| 185 | 4.573 | 6.232  | 7.840  | 8.326  | 8.841  | 8.199 | 5.742  |
| 186 | 4.635 | 5.900  | 8.793  | 7.550  | 9.015  | 5.324 | 9.828  |
| 187 | 4.760 | 6.889  | 10.527 | 9.680  | 9.211  | 8.862 | 15.242 |
| 188 | 4.921 | 5.465  | 11.676 | 9.018  | 5.792  | 6.187 | 9.395  |
| 189 | 4.481 | 8.934  | 10.104 | 9.164  | 6.698  | 6.244 | 8.531  |
| 190 | 4.943 | 8.210  | 9.950  | 10.247 | 7.205  | 9.485 | 7.898  |
| 191 | 5.194 | 8.593  | 10.590 | 9.192  | 5.445  | 7.243 | 6.663  |
| 192 | 4.881 | 9.241  | 17.267 | 6.855  | 5.690  | 6.092 | 8.815  |
| 193 | 4.780 | 6.618  | 10.496 | 8.629  | 8.454  | 5.454 | 10.423 |
| 194 | 5.096 | 5.903  | 10.072 | 8.767  | 8.456  | 5.913 | 7.938  |
| 195 | 5.347 | 7.724  | 13.709 | 6.828  | 9.604  | 7.510 | 10.317 |
| 196 | 4.859 | 8.999  | 9.962  | 11.778 | 8.469  | 8.438 | 11.554 |
| 197 | 4.853 | 8.377  | 8.459  | 6.212  | 6.564  | 6.851 | 8.623  |
| 198 | 4.548 | 8.557  | 11.935 | 10.688 | 7.772  | 5.950 | 10.853 |
| 199 | 4.692 | 9.811  | 9.050  | 9.197  | 6.639  | 7.384 | 11.023 |
| 200 | 5.191 | 7.302  | 10.206 | 9.064  | 9.481  | 8.060 | 9.690  |
| 201 | 4.964 | 9.114  | 11.794 | 11.205 | 5.552  | 6.062 | 14.800 |
| 202 | 5.241 | 6.775  | 11.622 | 9.180  | 9.464  | 9.857 | 7.468  |
| 203 | 5.211 | 8.238  | 6.928  | 9.329  | 8.725  | 6.153 | 10.365 |
| 204 | 5.118 | 4.825  | 5.888  | 8.150  | 9.282  | 8.552 | 8.035  |
| 205 | 5.241 | 9.897  | 8.407  | 12.386 | 6.848  | 8.709 | 8.392  |
| 206 | 5.480 | 4.407  | 13.929 | 12.042 | 8.154  | 6.867 | 10.736 |

---

---

|     |       |        |        |        |        |        |        |
|-----|-------|--------|--------|--------|--------|--------|--------|
| 207 | 5.182 | 7.144  | 10.278 | 11.296 | 7.728  | 6.618  | 12.325 |
| 208 | 5.134 | 6.245  | 9.459  | 10.935 | 5.552  | 8.493  | 10.137 |
| 209 | 4.986 | 5.122  | 9.451  | 11.391 | 8.699  | 4.228  | 12.892 |
| 210 | 4.609 | 7.375  | 12.210 | 11.315 | 8.617  | 6.826  | 8.029  |
| 211 | 4.841 | 7.368  | 10.491 | 10.625 | 6.599  | 6.889  | 10.504 |
| 212 | 5.103 | 9.586  | 10.823 | 11.167 | 10.310 | 7.443  | 8.738  |
| 213 | 4.650 | 7.026  | 6.241  | 8.432  | 5.243  | 5.372  | 8.329  |
| 214 | 5.147 | 7.823  | 9.414  | 9.843  | 7.111  | 4.685  | 5.599  |
| 215 | 5.102 | 7.210  | 9.813  | 10.979 | 7.143  | 3.401  | 11.487 |
| 216 | 5.032 | 9.719  | 8.126  | 8.403  | 6.643  | 7.799  | 14.546 |
| 217 | 5.095 | 8.952  | 9.725  | 9.784  | 6.718  | 8.962  | 10.870 |
| 218 | 5.008 | 6.813  | 8.588  | 9.406  | 8.696  | 6.026  | 13.088 |
| 219 | 4.993 | 7.004  | 11.778 | 12.690 | 6.408  | 12.581 | 9.901  |
| 220 | 4.997 | 10.487 | 8.646  | 10.801 | 7.922  | 5.725  | 7.534  |
| 221 | 5.293 | 6.409  | 12.929 | 12.305 | 7.088  | 4.807  | 8.128  |
| 222 | 4.972 | 8.376  | 9.684  | 11.146 | 7.578  | 6.514  | 8.249  |
| 223 | 4.168 | 5.485  | 11.842 | 12.087 | 12.049 | 6.955  | 12.350 |
| 224 | 4.847 | 5.643  | 15.955 | 9.591  | 6.905  | 8.083  | 8.832  |
| 225 | 5.062 | 8.386  | 9.914  | 10.022 | 9.520  | 6.983  | 9.969  |
| 226 | 5.302 | 7.959  | 13.467 | 8.576  | 7.867  | 5.545  | 7.372  |
| 227 | 5.435 | 8.795  | 7.764  | 10.611 | 7.855  | 4.549  | 9.406  |
| 228 | 4.703 | 5.823  | 14.451 | 18.633 | 5.084  | 5.807  | 6.929  |
| 229 | 5.240 | 8.710  | 7.541  | 9.985  | 9.814  | 4.742  | 8.426  |
| 230 | 5.075 | 7.086  | 9.636  | 9.690  | 8.076  | 8.171  | 11.485 |
| 231 | 4.934 | 6.717  | 9.111  | 11.711 | 7.074  | 6.586  | 14.046 |
| 232 | 5.008 | 10.259 | 7.637  | 7.049  | 7.866  | 4.174  | 10.837 |
| 233 | 4.991 | 9.647  | 7.381  | 12.392 | 7.611  | 7.443  | 9.982  |
| 234 | 5.044 | 3.924  | 11.226 | 8.191  | 11.780 | 5.320  | 12.274 |
| 235 | 5.075 | 7.412  | 7.254  | 11.018 | 6.080  | 9.621  | 11.409 |
| 236 | 4.788 | 5.522  | 7.330  | 10.367 | 6.874  | 6.859  | 5.820  |
| 237 | 4.671 | 6.316  | 12.450 | 9.646  | 8.275  | 7.183  | 6.690  |
| 238 | 5.304 | 5.821  | 9.776  | 8.417  | 11.838 | 5.511  | 8.196  |
| 239 | 4.931 | 10.098 | 10.602 | 10.677 | 8.265  | 7.755  | 8.126  |
| 240 | 5.446 | 9.197  | 8.054  | 12.383 | 10.016 | 6.882  | 6.967  |
| 241 | 4.709 | 7.780  | 9.369  | 11.287 | 9.239  | 7.158  | 8.469  |
| 242 | 4.813 | 8.067  | 10.438 | 13.108 | 9.170  | 6.224  | 8.028  |
| 243 | 5.448 | 7.598  | 10.130 | 7.313  | 10.421 | 8.002  | 12.345 |
| 244 | 5.443 | 8.028  | 14.342 | 9.822  | 13.062 | 3.582  | 8.593  |
| 245 | 4.676 | 7.224  | 8.548  | 7.372  | 8.063  | 7.065  | 7.462  |
| 246 | 5.065 | 6.505  | 9.463  | 10.021 | 7.307  | 8.892  | 8.953  |
| 247 | 5.422 | 7.691  | 11.683 | 10.959 | 8.136  | 6.438  | 8.457  |
| 248 | 5.420 | 6.300  | 11.977 | 8.329  | 7.286  | 7.867  | 10.337 |

---

|     |       |        |        |        |        |        |        |
|-----|-------|--------|--------|--------|--------|--------|--------|
| 249 | 4.595 | 6.172  | 6.399  | 12.800 | 4.637  | 5.793  | 9.311  |
| 250 | 5.510 | 6.362  | 8.985  | 8.856  | 7.599  | 7.078  | 7.138  |
| 251 | 5.208 | 6.650  | 8.452  | 11.148 | 8.100  | 5.811  | 11.057 |
| 252 | 5.072 | 6.808  | 9.739  | 9.095  | 7.183  | 9.120  | 9.053  |
| 253 | 4.929 | 12.599 | 10.915 | 8.345  | 7.428  | 7.648  | 8.611  |
| 254 | 4.696 | 5.042  | 10.751 | 8.382  | 10.302 | 9.686  | 8.164  |
| 255 | 5.030 | 5.232  | 12.483 | 7.218  | 7.946  | 6.693  | 11.569 |
| 256 | 4.919 | 7.215  | 10.758 | 13.455 | 7.748  | 6.662  | 9.555  |
| 257 | 5.728 | 6.712  | 10.457 | 5.858  | 6.721  | 7.342  | 7.037  |
| 258 | 5.060 | 5.687  | 11.970 | 7.465  | 6.881  | 9.870  | 15.487 |
| 259 | 4.945 | 7.359  | 10.714 | 6.454  | 7.625  | 3.629  | 9.095  |
| 260 | 4.996 | 8.165  | 7.355  | 7.383  | 8.028  | 4.370  | 10.356 |
| 261 | 4.807 | 5.128  | 10.005 | 5.450  | 8.513  | 9.414  | 10.541 |
| 262 | 5.653 | 6.151  | 6.852  | 11.099 | 11.269 | 11.085 | 7.414  |
| 263 | 5.201 | 4.963  | 12.402 | 9.866  | 10.584 | 6.414  | 12.665 |
| 264 | 5.024 | 6.935  | 6.217  | 7.882  | 5.958  | 9.630  | 10.312 |
| 265 | 5.354 | 7.072  | 8.685  | 7.448  | 11.581 | 11.914 | 10.080 |
| 266 | 4.990 | 8.026  | 9.972  | 7.422  | 6.249  | 7.109  | 13.017 |
| 267 | 4.969 | 5.213  | 9.693  | 9.228  | 13.911 | 6.008  | 10.113 |
| 268 | 4.825 | 7.306  | 14.637 | 6.404  | 8.158  | 5.975  | 6.789  |
| 269 | 4.806 | 6.561  | 9.889  | 10.653 | 7.067  | 6.329  | 9.745  |
| 270 | 5.505 | 9.541  | 8.567  | 9.600  | 4.950  | 8.332  | 12.520 |
| 271 | 5.242 | 7.323  | 11.084 | 9.106  | 7.132  | 6.472  | 12.642 |
| 272 | 5.027 | 5.961  | 7.544  | 11.216 | 11.036 | 11.508 | 10.342 |
| 273 | 5.537 | 6.426  | 10.985 | 10.518 | 7.108  | 6.193  | 6.830  |
| 274 | 5.007 | 5.962  | 10.313 | 9.101  | 7.048  | 5.614  | 12.335 |
| 275 | 5.091 | 9.652  | 8.983  | 9.846  | 5.805  | 7.798  | 9.660  |
| 276 | 4.553 | 5.999  | 8.552  | 9.513  | 5.989  | 7.194  | 10.184 |
| 277 | 5.150 | 4.592  | 7.570  | 8.580  | 6.848  | 7.633  | 12.827 |
| 278 | 4.544 | 6.469  | 6.531  | 12.349 | 8.458  | 3.920  | 10.649 |
| 279 | 4.689 | 8.981  | 8.923  | 12.586 | 4.904  | 6.507  | 4.444  |
| 280 | 5.299 | 7.988  | 11.546 | 9.932  | 9.064  | 4.195  | 6.874  |
| 281 | 5.111 | 7.072  | 8.385  | 7.889  | 7.000  | 7.101  | 8.205  |
| 282 | 4.725 | 10.502 | 13.729 | 7.651  | 9.348  | 8.259  | 7.438  |
| 283 | 4.875 | 5.888  | 8.077  | 10.311 | 7.792  | 9.202  | 10.101 |
| 284 | 5.081 | 7.238  | 15.469 | 9.255  | 7.060  | 8.234  | 10.098 |
| 285 | 5.069 | 5.493  | 8.424  | 8.250  | 8.734  | 7.676  | 8.443  |
| 286 | 4.461 | 5.607  | 9.983  | 10.057 | 8.739  | 8.282  | 12.527 |
| 287 | 4.620 | 6.248  | 13.295 | 7.632  | 12.303 | 6.667  | 8.275  |
| 288 | 4.442 | 7.958  | 12.733 | 10.506 | 5.820  | 6.699  | 9.088  |
| 289 | 4.977 | 11.214 | 8.306  | 7.007  | 6.660  | 8.828  | 8.489  |
| 290 | 4.458 | 8.257  | 11.450 | 5.850  | 5.923  | 8.983  | 8.087  |

---

|     |       |        |        |        |        |        |        |
|-----|-------|--------|--------|--------|--------|--------|--------|
| 291 | 5.221 | 5.233  | 7.694  | 9.365  | 6.861  | 5.985  | 9.892  |
| 292 | 4.683 | 6.463  | 6.777  | 7.963  | 6.962  | 4.235  | 7.278  |
| 293 | 4.651 | 5.935  | 11.262 | 13.484 | 7.062  | 3.719  | 9.152  |
| 294 | 5.564 | 6.326  | 6.743  | 13.044 | 7.019  | 4.432  | 11.659 |
| 295 | 5.681 | 9.061  | 6.177  | 8.605  | 6.954  | 5.213  | 11.618 |
| 296 | 4.742 | 7.450  | 9.647  | 7.989  | 7.395  | 7.603  | 6.475  |
| 297 | 4.988 | 8.654  | 13.156 | 9.349  | 8.589  | 5.527  | 10.658 |
| 298 | 5.618 | 7.872  | 12.690 | 9.156  | 10.021 | 6.617  | 8.874  |
| 299 | 4.830 | 5.600  | 7.091  | 13.078 | 7.185  | 7.450  | 10.757 |
| 300 | 5.541 | 8.527  | 9.851  | 9.094  | 11.767 | 4.714  | 10.141 |
| 301 | 5.258 | 4.888  | 11.609 | 12.595 | 9.493  | 5.421  | 9.145  |
| 302 | 5.017 | 8.258  | 12.043 | 12.679 | 10.263 | 5.565  | 9.751  |
| 303 | 4.889 | 7.865  | 13.659 | 16.588 | 6.256  | 5.490  | 11.122 |
| 304 | 5.533 | 8.887  | 13.734 | 9.035  | 5.169  | 6.034  | 11.404 |
| 305 | 5.224 | 4.806  | 11.743 | 8.855  | 8.395  | 8.307  | 8.342  |
| 306 | 4.801 | 6.466  | 7.199  | 13.899 | 8.428  | 5.928  | 7.381  |
| 307 | 5.124 | 6.825  | 9.856  | 8.380  | 5.320  | 8.109  | 8.947  |
| 308 | 4.723 | 6.963  | 7.268  | 6.687  | 5.583  | 7.394  | 12.137 |
| 309 | 5.047 | 8.414  | 12.732 | 9.962  | 8.443  | 7.113  | 10.515 |
| 310 | 5.483 | 8.061  | 14.201 | 10.864 | 9.849  | 8.724  | 10.629 |
| 311 | 5.168 | 7.966  | 6.361  | 9.066  | 10.584 | 11.821 | 8.903  |
| 312 | 4.761 | 7.097  | 11.691 | 9.090  | 6.344  | 9.919  | 8.314  |
| 313 | 5.110 | 10.226 | 9.080  | 7.352  | 8.937  | 4.477  | 15.183 |
| 314 | 4.780 | 6.277  | 8.820  | 14.037 | 8.956  | 7.768  | 9.563  |
| 315 | 5.636 | 6.965  | 8.075  | 10.204 | 7.744  | 4.888  | 9.709  |
| 316 | 4.435 | 5.903  | 12.815 | 8.722  | 6.156  | 4.006  | 9.227  |
| 317 | 4.792 | 6.694  | 10.610 | 10.642 | 6.084  | 4.935  | 9.924  |
| 318 | 5.243 | 8.110  | 9.526  | 11.652 | 9.214  | 3.831  | 9.138  |
| 319 | 4.742 | 5.037  | 10.688 | 7.853  | 5.342  | 5.038  | 7.838  |
| 320 | 5.006 | 7.119  | 12.145 | 10.256 | 7.299  | 9.631  | 10.854 |
| 321 | 5.206 | 5.680  | 8.109  | 8.842  | 8.051  | 5.976  | 13.265 |
| 322 | 5.396 | 8.235  | 8.241  | 13.826 | 9.975  | 13.610 | 10.169 |
| 323 | 4.708 | 4.207  | 11.328 | 10.114 | 7.194  | 7.492  | 8.352  |
| 324 | 4.946 | 4.217  | 13.732 | 7.729  | 5.702  | 8.790  | 9.896  |
| 325 | 4.851 | 10.098 | 12.779 | 9.558  | 8.435  | 6.513  | 12.137 |
| 326 | 4.964 | 6.552  | 9.533  | 10.748 | 6.634  | 6.291  | 14.266 |
| 327 | 5.116 | 4.204  | 7.344  | 15.193 | 11.636 | 5.516  | 7.261  |
| 328 | 4.805 | 4.504  | 5.912  | 9.864  | 6.416  | 7.056  | 10.017 |
| 329 | 5.252 | 6.652  | 8.011  | 11.028 | 8.106  | 4.597  | 8.921  |
| 330 | 5.134 | 7.324  | 12.452 | 12.582 | 12.351 | 5.421  | 10.974 |
| 331 | 4.851 | 7.378  | 8.686  | 10.884 | 9.888  | 5.120  | 10.134 |
| 332 | 5.087 | 8.814  | 10.386 | 8.153  | 7.770  | 7.070  | 8.632  |

---



---

|     |       |        |        |        |        |        |        |
|-----|-------|--------|--------|--------|--------|--------|--------|
| 333 | 5.310 | 7.370  | 10.229 | 9.458  | 8.688  | 10.045 | 6.668  |
| 334 | 5.313 | 6.674  | 6.092  | 8.523  | 13.394 | 11.874 | 7.560  |
| 335 | 5.210 | 8.773  | 12.781 | 11.345 | 10.690 | 4.281  | 8.599  |
| 336 | 4.980 | 11.227 | 15.089 | 13.510 | 5.785  | 7.406  | 9.227  |
| 337 | 4.805 | 6.839  | 9.691  | 9.738  | 8.131  | 5.705  | 12.544 |
| 338 | 5.071 | 6.408  | 12.107 | 12.203 | 9.912  | 5.104  | 8.621  |
| 339 | 4.853 | 8.753  | 8.307  | 8.454  | 5.522  | 6.951  | 10.580 |
| 340 | 4.895 | 6.004  | 11.106 | 10.115 | 8.323  | 5.983  | 11.847 |
| 341 | 5.291 | 4.733  | 15.411 | 9.428  | 7.681  | 6.857  | 10.270 |
| 342 | 5.456 | 6.621  | 12.949 | 13.767 | 8.323  | 8.267  | 9.955  |
| 343 | 5.188 | 7.214  | 8.410  | 10.404 | 6.508  | 5.302  | 8.592  |
| 344 | 5.647 | 7.041  | 7.853  | 11.490 | 5.171  | 6.502  | 11.686 |
| 345 | 4.518 | 5.173  | 9.884  | 9.108  | 6.128  | 4.343  | 13.807 |
| 346 | 5.007 | 5.874  | 9.288  | 8.567  | 11.894 | 6.123  | 10.814 |
| 347 | 5.030 | 5.757  | 9.642  | 10.626 | 7.576  | 8.756  | 10.436 |
| 348 | 5.509 | 8.577  | 12.836 | 8.241  | 6.297  | 4.292  | 10.278 |
| 349 | 5.158 | 6.582  | 10.247 | 7.354  | 10.853 | 7.492  | 12.173 |
| 350 | 4.898 | 7.961  | 13.965 | 9.183  | 9.592  | 4.756  | 9.116  |
| 351 | 5.175 | 7.863  | 9.683  | 13.678 | 6.424  | 7.164  | 8.773  |
| 352 | 5.202 | 6.483  | 9.497  | 9.011  | 9.934  | 6.017  | 10.944 |
| 353 | 5.058 | 4.192  | 11.585 | 10.246 | 10.014 | 6.292  | 9.163  |
| 354 | 4.361 | 7.424  | 10.708 | 8.638  | 6.554  | 4.454  | 11.811 |
| 355 | 5.322 | 8.068  | 9.342  | 6.366  | 8.808  | 5.336  | 7.171  |
| 356 | 3.900 | 5.655  | 6.951  | 9.784  | 7.176  | 6.434  | 12.950 |
| 357 | 5.034 | 6.767  | 7.691  | 13.951 | 10.335 | 6.894  | 8.376  |
| 358 | 4.511 | 6.101  | 11.155 | 9.126  | 5.872  | 6.437  | 10.285 |
| 359 | 4.888 | 10.289 | 10.981 | 7.687  | 7.115  | 5.725  | 8.855  |
| 360 | 5.441 | 6.744  | 7.132  | 7.949  | 9.382  | 9.567  | 11.374 |
| 361 | 4.838 | 7.141  | 10.027 | 10.559 | 7.662  | 6.432  | 7.242  |
| 362 | 5.604 | 5.263  | 10.948 | 8.958  | 8.880  | 5.527  | 7.799  |
| 363 | 5.245 | 5.679  | 7.595  | 12.022 | 11.532 | 5.552  | 13.818 |
| 364 | 4.922 | 4.881  | 7.889  | 9.233  | 7.086  | 6.634  | 7.953  |
| 365 | 4.715 | 8.116  | 12.626 | 6.319  | 6.095  | 8.620  | 8.433  |
| 366 | 4.844 | 7.879  | 6.708  | 8.922  | 11.086 | 6.057  | 9.908  |
| 367 | 5.118 | 5.552  | 10.755 | 11.357 | 7.069  | 8.492  | 8.256  |
| 368 | 4.253 | 13.742 | 12.054 | 12.131 | 8.379  | 7.178  | 10.087 |
| 369 | 5.194 | 8.502  | 6.654  | 12.806 | 6.843  | 5.842  | 12.544 |
| 370 | 5.088 | 7.502  | 9.503  | 12.065 | 5.480  | 5.468  | 9.921  |
| 371 | 5.258 | 10.843 | 7.595  | 12.251 | 6.303  | 7.086  | 14.095 |
| 372 | 5.645 | 3.733  | 9.963  | 14.550 | 10.479 | 6.586  | 7.192  |
| 373 | 4.898 | 6.646  | 8.926  | 13.493 | 7.104  | 5.344  | 9.206  |
| 374 | 4.691 | 6.754  | 6.858  | 10.149 | 7.541  | 5.501  | 8.125  |

---

---

|     |       |        |        |        |        |        |        |
|-----|-------|--------|--------|--------|--------|--------|--------|
| 375 | 5.372 | 7.134  | 11.158 | 8.854  | 8.345  | 7.787  | 10.572 |
| 376 | 5.282 | 5.275  | 11.106 | 9.226  | 10.165 | 7.752  | 7.485  |
| 377 | 4.955 | 7.731  | 8.558  | 11.335 | 8.072  | 6.239  | 6.735  |
| 378 | 4.813 | 3.957  | 10.944 | 12.602 | 7.359  | 8.392  | 8.996  |
| 379 | 5.078 | 6.975  | 7.324  | 9.288  | 6.439  | 6.176  | 6.657  |
| 380 | 4.644 | 7.563  | 7.498  | 13.432 | 8.893  | 6.565  | 8.084  |
| 381 | 5.021 | 6.727  | 7.630  | 8.404  | 4.875  | 9.336  | 8.708  |
| 382 | 4.799 | 7.426  | 9.546  | 8.874  | 5.988  | 5.878  | 6.864  |
| 383 | 4.742 | 5.640  | 8.733  | 9.021  | 9.206  | 3.972  | 11.019 |
| 384 | 5.305 | 7.769  | 14.726 | 8.516  | 8.625  | 4.835  | 10.432 |
| 385 | 5.010 | 6.202  | 9.625  | 11.739 | 5.852  | 7.299  | 8.562  |
| 386 | 5.426 | 4.534  | 11.024 | 9.407  | 8.802  | 6.396  | 7.280  |
| 387 | 4.658 | 6.300  | 11.053 | 14.421 | 8.669  | 13.863 | 9.224  |
| 388 | 5.076 | 5.841  | 10.584 | 9.770  | 5.975  | 4.679  | 9.437  |
| 389 | 4.670 | 5.292  | 10.183 | 14.465 | 7.675  | 6.349  | 6.171  |
| 390 | 5.195 | 7.685  | 12.762 | 5.879  | 11.186 | 6.837  | 12.899 |
| 391 | 5.411 | 6.862  | 7.613  | 10.553 | 6.980  | 4.729  | 10.723 |
| 392 | 5.322 | 6.386  | 13.879 | 10.382 | 5.760  | 8.964  | 6.744  |
| 393 | 4.334 | 5.945  | 11.323 | 14.676 | 8.084  | 8.214  | 14.868 |
| 394 | 5.215 | 10.227 | 7.637  | 10.334 | 6.876  | 10.116 | 9.465  |
| 395 | 5.003 | 9.045  | 12.401 | 14.204 | 7.195  | 8.094  | 7.156  |
| 396 | 5.105 | 6.489  | 12.595 | 14.546 | 8.554  | 2.682  | 8.036  |
| 397 | 4.828 | 6.940  | 14.095 | 8.590  | 7.704  | 5.258  | 10.338 |
| 398 | 4.480 | 9.826  | 8.930  | 7.622  | 7.158  | 7.339  | 7.208  |
| 399 | 5.281 | 10.523 | 13.891 | 11.710 | 6.184  | 5.471  | 8.845  |
| 400 | 4.840 | 8.891  | 10.341 | 8.247  | 6.485  | 7.285  | 9.570  |
| 401 | 4.896 | 6.276  | 7.139  | 9.466  | 6.195  | 6.650  | 8.936  |
| 402 | 5.053 | 5.895  | 8.274  | 8.679  | 6.807  | 5.866  | 10.209 |
| 403 | 5.799 | 8.162  | 11.929 | 9.992  | 11.592 | 6.887  | 8.409  |
| 404 | 5.722 | 5.504  | 14.357 | 11.085 | 8.064  | 7.734  | 9.273  |
| 405 | 4.585 | 5.233  | 7.582  | 11.358 | 6.893  | 9.115  | 10.181 |
| 406 | 4.851 | 6.231  | 9.542  | 10.065 | 7.579  | 5.360  | 6.109  |
| 407 | 5.311 | 8.579  | 8.488  | 8.022  | 8.243  | 5.829  | 6.513  |
| 408 | 4.347 | 7.064  | 14.627 | 8.192  | 8.300  | 5.607  | 7.800  |
| 409 | 5.392 | 7.213  | 8.063  | 10.401 | 8.380  | 8.440  | 9.945  |
| 410 | 4.901 | 8.940  | 13.004 | 6.189  | 9.969  | 10.195 | 10.207 |
| 411 | 5.441 | 7.195  | 8.547  | 7.648  | 7.219  | 8.910  | 8.375  |
| 412 | 4.723 | 5.147  | 11.544 | 7.046  | 8.449  | 9.598  | 12.912 |
| 413 | 4.709 | 8.344  | 7.356  | 9.133  | 6.786  | 7.220  | 12.431 |
| 414 | 5.729 | 7.632  | 13.483 | 10.830 | 5.134  | 5.490  | 9.418  |
| 415 | 5.185 | 6.650  | 6.092  | 16.058 | 6.858  | 8.078  | 19.779 |
| 416 | 4.902 | 6.144  | 10.473 | 9.774  | 10.732 | 10.612 | 9.050  |

---

---

|     |       |        |        |        |        |        |        |
|-----|-------|--------|--------|--------|--------|--------|--------|
| 417 | 4.675 | 5.950  | 10.696 | 7.821  | 7.202  | 7.720  | 12.043 |
| 418 | 5.348 | 6.755  | 8.195  | 8.896  | 9.817  | 8.621  | 9.648  |
| 419 | 5.108 | 5.590  | 7.943  | 10.769 | 8.931  | 4.525  | 6.785  |
| 420 | 4.287 | 5.997  | 11.137 | 12.119 | 6.819  | 7.852  | 14.561 |
| 421 | 4.715 | 4.728  | 7.825  | 8.885  | 11.997 | 6.500  | 7.806  |
| 422 | 5.936 | 5.988  | 9.713  | 9.773  | 9.494  | 7.816  | 9.932  |
| 423 | 4.996 | 5.738  | 5.337  | 12.543 | 9.557  | 9.438  | 14.688 |
| 424 | 4.370 | 7.823  | 6.253  | 10.252 | 6.356  | 5.727  | 11.204 |
| 425 | 4.720 | 9.689  | 9.679  | 9.949  | 6.743  | 10.019 | 10.578 |
| 426 | 4.868 | 8.747  | 12.421 | 9.127  | 9.021  | 5.291  | 9.481  |
| 427 | 5.219 | 8.771  | 6.860  | 9.025  | 10.217 | 6.839  | 10.299 |
| 428 | 4.949 | 8.013  | 11.304 | 12.211 | 7.754  | 7.330  | 14.593 |
| 429 | 5.032 | 7.764  | 10.866 | 8.751  | 11.466 | 8.936  | 8.868  |
| 430 | 4.994 | 8.159  | 8.613  | 9.686  | 7.579  | 6.219  | 9.330  |
| 431 | 4.697 | 5.687  | 9.722  | 7.877  | 9.168  | 5.301  | 8.879  |
| 432 | 5.369 | 8.326  | 15.638 | 11.102 | 7.806  | 9.789  | 8.961  |
| 433 | 4.885 | 5.073  | 7.236  | 10.307 | 9.977  | 7.437  | 9.427  |
| 434 | 4.854 | 7.902  | 10.833 | 10.731 | 7.247  | 4.108  | 11.148 |
| 435 | 5.061 | 5.546  | 10.217 | 9.728  | 7.745  | 7.355  | 9.963  |
| 436 | 4.979 | 5.363  | 10.472 | 8.374  | 5.555  | 4.343  | 8.323  |
| 437 | 4.836 | 6.083  | 9.760  | 9.609  | 8.349  | 8.315  | 13.875 |
| 438 | 5.040 | 4.945  | 10.381 | 7.475  | 7.959  | 9.714  | 8.133  |
| 439 | 5.666 | 6.821  | 9.260  | 9.113  | 8.784  | 6.451  | 9.117  |
| 440 | 5.171 | 8.909  | 6.796  | 15.866 | 8.417  | 5.339  | 9.945  |
| 441 | 4.794 | 6.394  | 8.622  | 13.889 | 6.709  | 9.317  | 6.847  |
| 442 | 4.726 | 7.668  | 10.277 | 11.734 | 9.057  | 5.923  | 7.896  |
| 443 | 4.925 | 7.069  | 10.330 | 10.723 | 14.034 | 5.466  | 7.434  |
| 444 | 4.504 | 9.131  | 11.124 | 11.633 | 6.752  | 4.869  | 5.561  |
| 445 | 5.575 | 6.538  | 15.737 | 10.615 | 9.621  | 4.615  | 15.364 |
| 446 | 5.064 | 7.298  | 6.853  | 11.892 | 6.849  | 7.270  | 8.376  |
| 447 | 4.634 | 12.404 | 11.308 | 12.595 | 6.358  | 6.206  | 11.683 |
| 448 | 5.038 | 8.986  | 10.061 | 7.898  | 6.059  | 8.310  | 9.814  |
| 449 | 4.545 | 5.411  | 9.693  | 9.399  | 8.878  | 6.667  | 7.921  |
| 450 | 5.183 | 8.929  | 8.422  | 9.727  | 7.859  | 6.406  | 9.695  |
| 451 | 4.943 | 5.424  | 9.509  | 8.708  | 9.495  | 4.320  | 10.654 |
| 452 | 5.013 | 6.811  | 11.308 | 7.943  | 7.474  | 5.528  | 7.676  |
| 453 | 5.114 | 7.292  | 10.708 | 12.772 | 5.987  | 6.953  | 12.603 |
| 454 | 5.269 | 8.401  | 6.925  | 11.252 | 7.460  | 6.052  | 12.600 |
| 455 | 4.745 | 6.167  | 11.870 | 8.083  | 7.672  | 9.434  | 9.578  |
| 456 | 4.538 | 7.747  | 10.310 | 7.846  | 8.952  | 4.197  | 11.137 |
| 457 | 4.967 | 10.462 | 14.672 | 10.699 | 5.940  | 6.454  | 7.553  |
| 458 | 4.741 | 4.269  | 7.698  | 8.468  | 5.152  | 6.971  | 11.037 |

---

|     |       |        |        |        |        |        |        |
|-----|-------|--------|--------|--------|--------|--------|--------|
| 459 | 5.134 | 5.226  | 8.370  | 7.610  | 8.648  | 5.605  | 9.516  |
| 460 | 4.416 | 9.094  | 6.710  | 9.288  | 6.549  | 6.967  | 13.748 |
| 461 | 5.270 | 6.325  | 9.780  | 8.196  | 6.984  | 10.433 | 7.984  |
| 462 | 5.097 | 6.732  | 12.098 | 11.689 | 8.828  | 5.145  | 14.973 |
| 463 | 4.650 | 8.512  | 8.818  | 15.864 | 7.832  | 6.175  | 9.820  |
| 464 | 4.900 | 11.685 | 8.743  | 6.849  | 8.095  | 4.674  | 10.746 |
| 465 | 5.264 | 4.946  | 9.174  | 11.660 | 10.182 | 8.180  | 13.293 |
| 466 | 5.764 | 5.444  | 9.442  | 10.688 | 9.914  | 4.941  | 12.352 |
| 467 | 4.889 | 6.668  | 12.172 | 8.199  | 7.806  | 5.410  | 8.122  |
| 468 | 5.435 | 6.796  | 9.806  | 11.967 | 6.921  | 9.805  | 8.055  |
| 469 | 4.729 | 6.974  | 8.811  | 8.121  | 5.963  | 8.386  | 8.055  |
| 470 | 5.065 | 6.296  | 11.198 | 6.594  | 8.374  | 5.556  | 12.278 |
| 471 | 4.935 | 9.149  | 7.293  | 7.731  | 13.126 | 8.819  | 9.501  |
| 472 | 5.107 | 5.443  | 11.112 | 11.043 | 9.872  | 5.698  | 8.899  |
| 473 | 4.843 | 7.141  | 9.349  | 10.661 | 8.205  | 6.956  | 9.951  |
| 474 | 4.552 | 8.650  | 15.464 | 12.070 | 6.093  | 10.915 | 12.177 |
| 475 | 4.915 | 7.446  | 8.503  | 10.843 | 5.920  | 12.187 | 9.454  |
| 476 | 5.138 | 5.838  | 10.702 | 12.740 | 6.923  | 6.028  | 10.440 |
| 477 | 4.841 | 6.998  | 10.023 | 6.427  | 3.360  | 6.713  | 5.987  |
| 478 | 4.942 | 6.289  | 7.750  | 9.178  | 8.568  | 8.871  | 8.489  |
| 479 | 5.127 | 5.870  | 11.792 | 9.066  | 10.318 | 7.927  | 7.801  |
| 480 | 5.170 | 9.452  | 6.062  | 9.665  | 7.997  | 6.367  | 8.540  |
| 481 | 4.769 | 6.475  | 6.437  | 12.235 | 7.247  | 6.407  | 8.321  |
| 482 | 4.915 | 5.901  | 7.379  | 8.490  | 10.576 | 5.515  | 8.942  |
| 483 | 5.274 | 5.651  | 12.932 | 10.314 | 7.084  | 3.742  | 8.812  |
| 484 | 5.104 | 6.999  | 12.069 | 6.555  | 6.847  | 6.495  | 11.240 |
| 485 | 4.575 | 4.718  | 7.472  | 8.075  | 9.607  | 4.951  | 13.255 |
| 486 | 5.488 | 4.548  | 9.403  | 11.913 | 7.810  | 6.376  | 7.064  |
| 487 | 4.806 | 7.122  | 8.332  | 6.789  | 6.762  | 12.877 | 14.175 |
| 488 | 4.780 | 4.961  | 10.274 | 13.159 | 9.462  | 6.826  | 12.832 |
| 489 | 4.552 | 6.164  | 15.339 | 8.839  | 7.000  | 10.029 | 9.974  |
| 490 | 4.965 | 8.209  | 8.097  | 10.927 | 10.906 | 5.065  | 13.666 |
| 491 | 4.968 | 8.509  | 14.845 | 7.645  | 6.770  | 9.435  | 10.299 |
| 492 | 4.898 | 9.903  | 8.844  | 11.459 | 6.824  | 4.374  | 7.878  |
| 493 | 4.736 | 5.312  | 8.497  | 9.780  | 6.771  | 6.290  | 12.417 |
| 494 | 4.477 | 8.374  | 11.138 | 12.723 | 8.451  | 7.299  | 15.691 |
| 495 | 5.949 | 7.356  | 11.378 | 8.724  | 10.462 | 7.953  | 8.299  |
| 496 | 5.473 | 9.222  | 10.377 | 8.386  | 8.469  | 6.550  | 7.909  |
| 497 | 4.887 | 7.170  | 7.133  | 8.349  | 9.280  | 5.103  | 12.445 |
| 498 | 4.964 | 8.289  | 8.425  | 14.798 | 10.346 | 4.926  | 9.729  |
| 499 | 5.113 | 8.972  | 8.112  | 9.130  | 7.578  | 5.605  | 7.325  |
| 500 | 4.996 | 6.146  | 8.755  | 6.983  | 9.656  | 5.187  | 12.706 |

| Statistical<br>parameter | $\mu$ | $\sigma$ |
|--------------------------|-------|----------|-------|----------|-------|----------|-------|----------|-------|----------|-------|----------|-------|----------|
|                          | 5     | 0.32     | 7     | 3.00     | 10    | 4.82     | 10    | 4.61     | 8     | 3.77     | 7     | 3.37     | 10    | 4.63     |
| NKDE                     | 5     | 0.35     | 7     | 3.23     | 10    | 4.71     | 10    | 4.49     | 8     | 3.32     | 7     | 3.35     | 10    | 4.59     |
